# Supplementary material
Source: publisher figshare collection journal article supplement (https://tandf.figshare.com/ndownloader/files/14230538)
Supplement: Supplementary file 1 [file 14230538]

# Online Supplement for “A Bi-Criteria Multiple-Choice Secretary Problem” by “Ge Yu, Sheldon H Jacobson and Negar Kiyavash”

---

## 1. Proof of Proposition 1

We show that for any  $0 < \lambda < 1$ ,

$$R_A(\Phi_\lambda) = \lambda R_A(\Phi_1) + (1 - \lambda) R_A(\Phi_2) \text{ and } R_B(\Phi_\lambda) = \lambda R_B(\Phi_1) + (1 - \lambda) R_B(\Phi_2), \quad (1)$$

where  $\Phi_\lambda = \lambda \Phi_1 + (1 - \lambda) \Phi_2$ . Thus,  $R_A(\Phi)$  and  $R_B(\Phi)$  are both convex and concave functions of  $\Phi$ . Therefore,  $R_A(\Phi)$  and  $R_B(\Phi)$  are both affine functions of  $\Phi$ . In the following, we consider  $R_A(\Phi_\lambda)$  first. The derivation for  $R_B(\Phi_\lambda)$  follows the same arguments, with  $\mathcal{A}(t)$  substituted by  $\mathcal{B}(t)$ .

Rewrite the objective function  $R_A(\Phi_\lambda)$  by conditioning on the sequence of  $\{(\mathcal{A}(t), \mathcal{B}(t))\}_{t=1}^T$  as

$$R_A(\Phi_\lambda) = \mathbb{E}\left[\sum_{t=1}^T X_t^{\Phi_\lambda} \mathcal{A}(t)\right] = \mathbb{E}_{\mathcal{A}, \mathcal{B}} \left[ \mathbb{E}_X \left[ \sum_{t=1}^T X_t^{\Phi_\lambda} \mathcal{A}(t) \mid \{(\mathcal{A}(t), \mathcal{B}(t))\}_{t=1}^T \right] \right], \quad (2)$$

where the outer expectation is taken with respect to the joint distribution of  $\{(\mathcal{A}(t), \mathcal{B}(t))\}_{t=1}^T$  and the inner expectation is taken with respect to  $\{X_t^{\Phi_\lambda}\}_{t=1}^T$ .

Consider  $\mathbb{E}_X[\sum_{t=1}^T X_t^{\Phi_\lambda} \mathcal{A}(t) \mid \{(\mathcal{A}(t), \mathcal{B}(t))\}_{t=1}^T = \{(\alpha_t, \beta_t)\}_{t=1}^T]$ . Then,

$$\begin{aligned} \mathbb{E}_X \left[ \sum_{t=1}^T X_t^{\Phi_\lambda} \mathcal{A}(t) \mid \{(\mathcal{A}(t), \mathcal{B}(t))\}_{t=1}^T = \{(\alpha_t, \beta_t)\}_{t=1}^T \right] &= \sum_{t=1}^T \mathbb{E}_X [X_t^{\Phi_\lambda} \mid \{(\mathcal{A}(t), \mathcal{B}(t))\}_{t=1}^T = \{(\alpha_t, \beta_t)\}_{t=1}^T] \alpha_t \\ &= \sum_{t=1}^T \mathbb{P}(X_t^{\Phi_\lambda} = 1 \mid \{(\mathcal{A}(t'), \mathcal{B}(t'))\}_{t'=1}^t = \{(\alpha_{t'}, \beta_{t'})\}_{t'=1}^t) \alpha_t, \end{aligned} \quad (3)$$

where (3) follows from  $X_t^{\Phi_\lambda}$  being a sequential candidate assignment with information of candidate attribute vectors till time  $t$ . From (8) and (10),

$$\mathbb{P}(X_t^{\Phi_\lambda} = 1 | \{(\mathcal{A}(t'), \mathcal{B}(t'))\}_{t'=1}^t = \{(\alpha_{t'}, \beta_{t'})\}_{t'=1}^t) = \chi_t^{\Phi_\lambda} = \lambda \chi_t^{\Phi_1} + (1 - \lambda) \chi_t^{\Phi_2},$$

for  $t = 1, 2, \dots, T$ , where  $\{\chi_t^{\Phi_1}\}_{t=1}^T$ ,  $\{\chi_t^{\Phi_2}\}_{t=1}^T$  and  $\{\chi_t^{\Phi_\lambda}\}_{t=1}^T$  denote the realized profiles of policy  $\Phi_1$ ,  $\Phi_2$  and  $\Phi_\lambda$  with respect to  $\{(\alpha_t, \beta_t)\}_{t=1}^T$ , respectively. Moreover, substituting  $\Phi_\lambda$  with  $\Phi_1$  and  $\Phi_2$  in (3) respectively, we have

$$\begin{aligned} \mathbb{E}_X \left[ \sum_{t=1}^T X_t^{\Phi_1} \mathcal{A}(t) | \{(\mathcal{A}(t), \mathcal{B}(t))\}_{t=1}^T = \{(\alpha_t, \beta_t)\}_{t=1}^T \right] \\ = \sum_{t=1}^T \mathbb{P}(X_t^{\Phi_1} = 1 | \{(\mathcal{A}(t'), \mathcal{B}(t'))\}_{t'=1}^t = \{(\alpha_{t'}, \beta_{t'})\}_{t'=1}^t) \alpha_t = \sum_{t=1}^T \chi_t^{\Phi_1} \alpha_t, \\ \mathbb{E}_X \left[ \sum_{t=1}^T X_t^{\Phi_2} \mathcal{A}(t) | \{(\mathcal{A}(t), \mathcal{B}(t))\}_{t=1}^T = \{(\alpha_t, \beta_t)\}_{t=1}^T \right] = \sum_{t=1}^T \chi_t^{\Phi_2} \alpha_t. \end{aligned}$$

Therefore,

$$\begin{aligned} \mathbb{E}_X \left[ \sum_{t=1}^T X_t^{\Phi_\lambda} \mathcal{A}(t) | \{(\mathcal{A}(t), \mathcal{B}(t))\}_{t=1}^T = \{(\alpha_t, \beta_t)\}_{t=1}^T \right] &= \sum_{t=1}^T \chi_t^{\Phi_\lambda} \alpha_t = \sum_{t=1}^T (\lambda \chi_t^{\Phi_1} + (1 - \lambda) \chi_t^{\Phi_2}) \alpha_t \\ &= \lambda \mathbb{E}_X \left[ \sum_{t=1}^T X_t^{\Phi_1} \mathcal{A}(t) | \{(\mathcal{A}(t), \mathcal{B}(t))\}_{t=1}^T = \{(\alpha_t, \beta_t)\}_{t=1}^T \right] \\ &\quad + (1 - \lambda) \mathbb{E}_X \left[ \sum_{t=1}^T X_t^{\Phi_2} \mathcal{A}(t) | \{(\mathcal{A}(t), \mathcal{B}(t))\}_{t=1}^T = \{(\alpha_t, \beta_t)\}_{t=1}^T \right], \end{aligned} \quad (4)$$

which holds for any sequence of realized candidate attribute vectors  $\{(\alpha_t, \beta_t)\}_{t=1}^T$ . Substituting (4) into (2) leads to

$$\begin{aligned} R_A(\Phi_\lambda) &= \lambda \mathbb{E}_{\mathcal{A}, \mathcal{B}} \left[ \mathbb{E}_X \left[ \sum_{t=1}^T X_t^{\Phi_1} \mathcal{A}(t) | \{(\mathcal{A}(t), \mathcal{B}(t))\}_{t=1}^T = \{(\alpha_t, \beta_t)\}_{t=1}^T \right] \right] \\ &\quad + (1 - \lambda) \mathbb{E}_{\mathcal{A}, \mathcal{B}} \left[ \mathbb{E}_X \left[ \sum_{t=1}^T X_t^{\Phi_2} \mathcal{A}(t) | \{(\mathcal{A}(t), \mathcal{B}(t))\}_{t=1}^T = \{(\alpha_t, \beta_t)\}_{t=1}^T \right] \right] \\ &= \lambda R_A(\Phi_1) + (1 - \lambda) R_A(\Phi_2), \end{aligned}$$

where the last equality follows from substituting  $\Phi_\lambda$  with  $\Phi_1$  and  $\Phi_2$  in (2), respectively. Therefore,  $R_A(\Phi)$  is an affine function of  $\Phi$ .

Following the same arguments with  $\mathcal{A}(t)$  substituted by  $\mathcal{B}(t)$ , we have  $R_B(\Phi)$  is an affine function of  $\Phi$ , which finishes the proof.  $\square$

## 2. Proof of Theorem 2

First, we show every  $\mathbb{M}$ -optimal policy for WOSA- $\eta$  is a Pareto optimal policy for BMSP. Let  $\Phi_1$  be an  $\mathbb{M}$ -optimal policy for WOSA- $\eta$ , then  $\Phi_1$  must satisfy one of the three conditions in Definition 2. If  $\Phi_1$  satisfies Definition 2(a), then  $\mathbf{w} > 0$ , and hence,  $\Phi_1$  is a Pareto optimal policy for BMSP by *Theorem 3.1.2* (Miettinen 1999, p. 78).

If  $\Phi_1$  satisfies Definition 2(b), then  $\mathbf{w} = (w_1, 0)$  with  $w_1 > 0$  and  $\max_{\Phi \in \Psi^\eta} R_w(\Phi) \Leftrightarrow \max_{\Phi \in \Psi^\eta} R_A(\Phi) = R_A(\Phi_1)$ . If  $\Phi_1$  is the unique policy that maximizes  $R_A(\Phi)$  in  $\Psi^\eta$ , then  $\Phi_1$  is a Pareto optimal policy for BMSP by *Theorem 3.1.3* (Miettinen 1999, p. 79). Otherwise,  $\Phi_1$  is not unique and we prove  $\Phi_1$  is Pareto optimal for BMSP by contradiction. Suppose  $\Phi_1$  is not Pareto optimal, then there exists another policy  $\Phi' \in \Psi^\eta$  such that  $R_A(\Phi') \geq R_A(\Phi)$ ,  $R_B(\Phi') \geq R_B(\Phi)$  with at least one strict inequality. Since  $R_A(\Phi_1) = \max_{\Phi \in \Psi^\eta} R_A(\Phi)$ , then  $R_A(\Phi') \leq R_A(\Phi_1)$ , and hence,  $R_A(\Phi') = R_A(\Phi_1)$ ,  $R_B(\Phi') > R_B(\Phi_1)$ . However, this is a contradictory to  $\mathbb{M}$ -optimality of  $\Phi_1$ . Therefore,  $\Phi_1$  is a Pareto optimal policy for BMSP.

If  $\Phi_1$  satisfies Definition 2(c), similar arguments can be applied.

For the reverse direction, we show every Pareto optimal policy for BMSP is  $\mathbb{M}$ -optimal for WOSA- $\eta$ . Let  $\Phi_2 \in \Psi^{\eta+}$  be a mixed policy, which is Pareto optimal for BMSP indexed by  $\eta$ . Then, by Proposition 1,  $\Psi^{\eta+}$  is convex and the objective functions  $R_A(\Phi)$  and  $R_B(\Phi)$  are affine functions of  $\Phi$ . Then from *Theorem 3.1.4* (Miettinen 1999, p. 79), there exists a non-negative weight vector  $\mathbf{w}$  such that  $\Phi_2$  maximizes  $R_w(\Phi)$ , which is the objective function of WOSA indexed by  $\mathbf{w}$  defined in (6). From Section 4.3, optimal policies for WOSA- $\eta$  are all pure policies, and hence,  $\Phi_2 \in \Psi^\eta$ . We are left to show  $\Phi_2$  satisfies one of the three conditions in Definition 2 to prove  $\Phi_2$  is  $\mathbb{M}$ -optimal for WOSA- $\eta$ .

If  $\mathbf{w} > 0$ , then Definition 2(a) is satisfied and  $\Phi$  is  $\mathbb{M}$ -optimal for WOSA- $\eta$ .

If  $\mathbf{w} = (w_1, 0)$  with  $w_1 > 0$ , then  $R_A(\Phi_2) = \max_{\Phi \in \Psi^\eta} R_A(\Phi)$ . We prove  $R_B(\Phi_2) = \max_{\Phi \in \Lambda_A^\eta} R_B(\Phi)$  with  $\Lambda_A^\eta$  defined by Definition 2(b) by contradiction. Suppose  $R_B(\Phi_2) \neq \max_{\Phi \in \Lambda_A^\eta} R_B(\Phi)$ , then there exists  $\Phi' \in \Lambda_A^\eta$  such that  $R_B(\Phi') = \max_{\Phi \in \Lambda_A^\eta} R_B(\Phi)$ . Therefore,  $R_A(\Phi') = R_A(\Phi_2)$ ,  $R_B(\Phi') >$

$R_B(\Phi_2)$ , which is a contradictory to the Pareto optimality of  $\Phi_2$ . Therefore,  $\Phi_2$  is  $\mathbb{M}$ -optimal for WOSA- $\eta$ .

If  $\mathbf{w} = (0, w_2)$  with  $w_2 > 0$ , similar arguments can be applied, which finishes the proof.  $\square$

### 3. Proof of Proposition 2

The proof is based on induction on  $T$ . First, we consider the corresponding SSAP with almost-binary success rates for  $T$  tasks. In this case, the SSAP optimal policy, denoted by  $\Phi_B$ , is a direct application of *Theorem 1* given by Derman et al. (1972).

**THEOREM 1 (*Theorem 1, Derman et al. (1972)*).** *For the  $t^{\text{th}}$  task arrival with the task value  $\mathcal{C}_t$ , there are  $T - t + 1$  workers available for  $t = 1, 2, \dots, T$ . The thresholds for  $\mathcal{C}_t$  are given by  $-\infty = a_{0,t} \leq a_{1,t} \leq \dots \leq a_{T-t+1,t} = +\infty$ , obtained based on the recursive equations*

$$a_{i,t} = \int_{a_{i-1,t+1}}^{a_{i,t+1}} x dF_{\mathcal{C}}(x) + a_{i-1,t+1} F_{\mathcal{C}}(a_{i-1,t+1}) + a_{i,t+1} (1 - F_{\mathcal{C}}(a_{i,t+1})), \quad i = 1, 2, \dots, T - t. \quad (5)$$

*If the  $t^{\text{th}}$  task value  $\mathcal{C}_t \in (a_{i-1,t}, a_{i,t}]$ , then the worker with the  $i^{\text{th}}$  smallest success rate among the  $T - t + 1$  available workers will be assigned to the  $t^{\text{th}}$  task under the optimal policy. Moreover,  $a_{i,t}$  is the expected task value that will be assigned to the worker with  $i^{\text{th}}$  smallest success rate among the  $T - t$  available workers for  $i = 1, 2, \dots, T - t$ .*

Let  $a_{i,t}$  denote the threshold values defined by (5) for  $T$ , with  $i = 1, 2, \dots, T - t$  and  $t = 0, 1, \dots, T - 1$ .

Then, the first task assignment under policy  $\Phi_B$  is

$$\tau_{j_1}^{\Phi_B} = \begin{cases} 1, & \text{if } \mathcal{C}_1 > a_{T-\lfloor \Upsilon \rfloor, 1}, \\ \Upsilon - \lfloor \Upsilon \rfloor, & \text{if } a_{T-\lfloor \Upsilon \rfloor-1, 1} < \mathcal{C}_1 \leq a_{T-\lfloor \Upsilon \rfloor, 1}, \\ 0, & \text{if } \mathcal{C}_1 \leq a_{T-\lfloor \Upsilon \rfloor-1, 1}. \end{cases} \quad (6)$$

Moreover, the optimal expected assignment reward is achieved under policy  $\Phi_B$  as  $\mathbb{E}[\sum_{t=2}^T \tau_{j_t}^{\Phi_B} \mathcal{C}_t] = \sum_{i=T-\lfloor \Upsilon \rfloor+1}^T a_{i,0} + a_{T-\lfloor \Upsilon \rfloor, 0}(\Upsilon - \lfloor \Upsilon \rfloor)$ .

When  $T = 1$ , there is only one task to be assigned to one worker, and hence,  $\Phi_B$  is trivially optimal for the SSAP with the fixed success rate sum.

Suppose Proposition 2 holds for  $T' \leq T - 1$ . When there are  $T$  tasks to be assigned, we need to show  $\tau_{j_1}^{\Phi_B}$  is optimal for the first task assignment in the fixed success rate sum scenario, and the remaining  $T - 1$  task assignments are optimal under policy  $\Phi_B$  by the induction assumption. Let  $a'_{i,t}$  denote the threshold values defined by (5) for  $T' = T - 1$ , with  $i = 1, 2, \dots, T - t$  and  $t = 0, 1, \dots, T - 2$ . We compute the optimal conditional expected reward for  $T$  tasks assignments given the first task value,

$$\begin{aligned} \max_{\{\tau_{j_t}\}_{t=1}^T} \mathbb{E}[\sum_{t=1}^T \tau_{j_t} \mathcal{C}_t | \sum_{t=1}^T \tau_{j_t} = \Upsilon, \mathcal{C}_1 = x_1] &= \max_{\{\tau_{j_t}\}_{t=1}^T} \mathbb{E}[\tau_{j_1} x_1 + \sum_{t=2}^T \tau_{j_t} \mathcal{C}_t | \sum_{t=1}^T \tau_{j_t} = \Upsilon, \mathcal{C}_1 = x_1] \\ &= \max_{0 \leq \tau_{j_1} \leq 1} (\tau_{j_1} x_1 + \max_{\{\tau_{j_t}\}_{t=2}^T} \mathbb{E}[\sum_{t=2}^T \tau_{j_t} \mathcal{C}_t | \sum_{t=2}^T \tau_{j_t} = \Upsilon - \tau_{j_1}]), \quad (7) \end{aligned}$$

where  $x_1$  denotes the realized value of the first task.

The second term on the right-hand side of (7) is the optimal expected reward for  $T - 1$  task assignments with the success rate sum of  $T - 1$  workers as  $\Upsilon - \tau_{j_1}$ , and

$$\lfloor \Upsilon - \tau_{j_1} \rfloor = \begin{cases} \lfloor \Upsilon \rfloor - 1, & \text{if } \tau_{j_1} > \Upsilon - \lfloor \Upsilon \rfloor, \\ \lfloor \Upsilon \rfloor, & \text{if } \tau_{j_1} \leq \Upsilon - \lfloor \Upsilon \rfloor. \end{cases} \quad (8)$$

Then by the induction assumption, the maximum of the second term on the right-hand side of (7) is achieved under the SSAP optimal policy for the almost-binary success rate scenario with  $T - 1$  workers. Therefore,

$$\begin{aligned} \max_{\{\tau_{j_t}\}_{t=2}^T} \mathbb{E}[\sum_{t=2}^T \tau_{j_t} \mathcal{C}_t | \sum_{t=2}^T \tau_{j_t} = \Upsilon - \tau_{j_1}] &= \sum_{i=T-\lfloor \Upsilon - \tau_{j_1} \rfloor}^{T-1} a'_{i,0} + a'_{T-\lfloor \Upsilon - \tau_{j_1} \rfloor-1,0}(\Upsilon - \tau_{j_1} - \lfloor \Upsilon - \tau_{j_1} \rfloor) \\ &= \begin{cases} \sum_{i=T-\lfloor \Upsilon \rfloor+1}^{T-1} a_{i,1} + a_{T-\lfloor \Upsilon \rfloor,1}(\Upsilon - \tau_{j_1} - \lfloor \Upsilon \rfloor + 1), & \text{if } \tau_{j_1} > \Upsilon - \lfloor \Upsilon \rfloor, \\ \sum_{i=T-\lfloor \Upsilon \rfloor}^{T-1} a_{i,1} + a_{T-\lfloor \Upsilon \rfloor-1,1}(\Upsilon - \tau_{j_1} - \lfloor \Upsilon \rfloor), & \text{if } \tau_{j_1} \leq \Upsilon - \lfloor \Upsilon \rfloor, \end{cases} \quad (9) \end{aligned}$$

where the second equality follows from (8) and the recursive definitions of threshold values (i.e.,  $a'_{i,0} = a_{i,1}$  for  $i = 1, 2, \dots, T - 1$ ). Then, we substitute (9) into (7) and compute the optimal expected conditional reward (7) for two cases: (a)  $\tau_{j_1} > \Upsilon - \lfloor \Upsilon \rfloor$  and (b)  $\tau_{j_1} \leq \Upsilon - \lfloor \Upsilon \rfloor$ , respectively, and then

combine them together to obtain the optimal assignment for the first task. Note that (7) is an affine function of  $\tau_{j_1}$  in both cases, and hence, the maximum of (7) is achieved at the boundary point of  $\tau_{j_1}$ . Therefore, in each case, we take derivative with respect to  $\tau_{j_1}$  and if the derivative is positive, the maximum (supremum) of (7) is achieved when  $\tau_{j_1}$  takes the maximum (supremum) value. Otherwise, the maximum (supremum) of (7) is achieved when  $\tau_{j_1}$  takes the minimum (infimum) value. Therefore, for case (a),  $\tau_{j_1} > \Upsilon - \lfloor \Upsilon \rfloor$ ,

$$\max_{\{\tau_{j_t}\}_{t=1}^T} \mathbb{E}[\sum_{t=1}^T \tau_{j_t} \mathcal{C}_t | \sum_{t=1}^T \tau_{j_t} = \Upsilon, \mathcal{C}_1 = x_1] = \begin{cases} \sum_{i=T-\lfloor \Upsilon \rfloor+1}^{T-1} a_{i,1} + x_1 + a_{T-\lfloor \Upsilon \rfloor,1}(\Upsilon - \lfloor \Upsilon \rfloor), & \text{if } x_1 > a_{T-\lfloor \Upsilon \rfloor,1}, \\ \sum_{i=T-\lfloor \Upsilon \rfloor+1}^{T-1} a_{i,1} + x_1(\Upsilon - \lfloor \Upsilon \rfloor) + a_{T-\lfloor \Upsilon \rfloor,1}, & \text{if } x_1 \leq a_{T-\lfloor \Upsilon \rfloor,1}, \end{cases} \quad (10)$$

where the second line is the supremum of the left-hand side and

$$\tau_{j_1} = \begin{cases} 1, & \text{if } x_1 > a_{T-\lfloor \Upsilon \rfloor,1}, \\ \Upsilon - \lfloor \Upsilon \rfloor, & \text{if } x_1 \leq a_{T-\lfloor \Upsilon \rfloor,1}, \end{cases}$$

with the second line being the infimum of the left-hand side.

For case (b),  $\tau_{j_1} \leq \Upsilon - \lfloor \Upsilon \rfloor$ ,

$$\max_{\{\tau_{j_t}\}_{t=1}^T} \mathbb{E}[\sum_{t=1}^T \tau_{j_t} \mathcal{C}_t | \sum_{t=1}^T \tau_{j_t} = \Upsilon, \mathcal{C}_1 = x_1] = \begin{cases} \sum_{i=T-\lfloor \Upsilon \rfloor}^{T-1} a_{i,1} + x_1(\Upsilon - \lfloor \Upsilon \rfloor), & \text{if } x_1 > a_{T-\lfloor \Upsilon \rfloor-1,1}, \\ \sum_{i=T-\lfloor \Upsilon \rfloor}^{T-1} a_{i,1} + a_{T-\lfloor \Upsilon \rfloor-1,1}(\Upsilon - \lfloor \Upsilon \rfloor), & \text{if } x_1 \leq a_{T-\lfloor \Upsilon \rfloor-1,1}, \end{cases} \quad (11)$$

where

$$\tau_{j_1} = \begin{cases} \Upsilon - \lfloor \Upsilon \rfloor, & \text{if } x_1 > a_{T-\lfloor \Upsilon \rfloor-1,1}, \\ 0, & \text{if } x_1 \leq a_{T-\lfloor \Upsilon \rfloor-1,1}. \end{cases}$$

Combining cases (a) and (b) together by comparing (11) and (10) leads to the optimal first task assignment as

$$\tau_{j_1} = \begin{cases} 1, & \text{if } x_1 > a_{T-\lfloor \Upsilon \rfloor,1}, \\ \Upsilon - \lfloor \Upsilon \rfloor, & \text{if } a_{T-\lfloor \Upsilon \rfloor-1,1} < x_1 \leq a_{T-\lfloor \Upsilon \rfloor,1}, \\ 0, & \text{if } x_1 \leq a_{T-\lfloor \Upsilon \rfloor-1,1}, \end{cases}$$

which is the same as the SSAP optimal policy assignment  $\tau_{j_1}^{\Phi_B}$  in the almost-binary success rate scenario given by (6). By the induction assumption, the optimal expected reward for assigning the remaining  $T - 1$  tasks to  $T - 1$  workers with a fixed success rate sum  $\Upsilon - \tau_{j_1}$  is achieved under the SSAP optimal policy  $\Phi_B$ . This completes the proof.  $\square$

#### 4. Proof of Theorem 3

The proof is by induction on  $T$ , using similar techniques as in Derman et al. (1972) but specifically trimmed for WOSA with discrete attribute distributions.

Let  $f(\eta, T)$  denote the optimal expected reward for  $T$  candidate assignments with a selectee capacity  $\eta$ . Further, let  $f(\eta, T|\gamma_1)$  denote the optimal conditional expected reward for  $T$  candidate assignments with a selectee capacity  $\eta$  given the first candidate combined attribute  $\mathcal{G}(1) = \gamma_1$ , then

$$f(\eta, T) = \max_{\Phi \in \Psi^\eta} \mathbb{E} \left[ \sum_{t=1}^T X_t^\Phi \mathcal{G}(t) \right],$$

$$f(\eta, T|\gamma_1) = \max_{\Phi \in \Psi^\eta} \mathbb{E} \left[ \sum_{t=1}^T X_t^\Phi \mathcal{G}(t) | \mathcal{G}(1) = \gamma_1 \right].$$

When  $T = 1$ , there is only one candidate to be assigned and  $a_{0,1} = -\infty$ ,  $a_{1,1} = +\infty$ . Then, under policy  $(\Phi 1)$ , this candidate will be assigned to the selectee category if  $\eta = 1$  while to the non-selectee category if  $\eta = 0$ . Therefore, policy  $(\Phi 1)$  is trivially optimal for  $T = 1$ . Moreover, the expected combined attribute value of this candidate is the expected value of  $\mathcal{G}(1)$ , and from (20),

$$a_{i,t} = \sum_{\gamma \in G_1} \gamma p_{\mathcal{G}}(\gamma) = \mathbb{E}[\mathcal{G}(1)].$$

Therefore, Theorem 3 holds for  $T = 1$ .

Suppose Theorem 3 holds for  $T' \leq T - 1$ . Then, policy  $(\Phi 1)$  with threshold values defined by (20) maximizes the objective function  $R_w(\Phi)$  (6) for  $T' = T - 1$  candidates. Let  $\{a'_{i,0}\}_{i=1}^{T'}$  denote the threshold values in the initial stage for  $T'$  candidates, which are the expected combined attribute values for  $T'$  candidates to be assigned by the induction assumption. Let  $\{a_{i,t}\}$  denote the threshold values defined by (20) for  $T$  candidates, for  $i = 1, 2, \dots, T - t$  and  $t = 0, 1, \dots, T - 1$ . We show the first candidate assignment under policy  $(\Phi 1)$  is optimal for  $T$  candidates, and optimal assignments for

the remaining  $T - 1$  candidates follow from the induction assumption. When there are  $T$  candidates to be assigned, conditional on the combined attribute value of the first candidate,

$$f(\eta, T | \gamma_1) = \max_{X_1^\Phi \in \{0,1\}} (\gamma_1 X_1^\Phi + f(\eta - X_1^\Phi, T - 1)). \quad (12)$$

Note that  $f(\eta - X_1^\Phi, T - 1)$  is the optimal expected reward for  $T - 1$  candidate assignments with a selectee capacity  $\eta - X_1^\Phi$ . Then, by the induction assumption, the optimal expected reward for  $T - 1$  candidate assignments is achieved under policy  $(\Phi 1)$ . Since  $\{a'_{i,0}\}_{i=1}^{T'}$  are monotonically increasing by (19), and hence,

$$f(\eta - X_1^\Phi, T - 1) = \sum_{i=(T-1)-(\eta-X_1^\Phi)+1}^{T-1} a'_{i,0}, \quad (13)$$

where the  $(\eta - X_1)$  largest expected candidate combined attribute values are assigned to the selectee category to maximize (6). Substitute (13) into (12); the optimal policy assigns  $X_1 = 1$  if

$$\gamma_1 + \sum_{i=(T-1)-(\eta-1)+1}^{T-1} a'_{i,0} > \sum_{i=(T-1)-\eta+1}^{T-1} a'_{i,0},$$

or equivalently,

$$\gamma_1 > a'_{(T-1)-\eta+1,0} = a'_{T-\eta,0} = a_{T-\eta,1}, \quad (14)$$

where the last equality follows from the recursive definitions of threshold values (20),  $a_{i,1} = a'_{i,0}$  for  $i = 1, 2, \dots, T - 1$  (the first stage for  $T$  candidates  $\{a_{i,1}\}_{i=1}^{T-1}$  are equal to the threshold values in the initial stage for  $T - 1$  candidates). Therefore, the optimal first candidate assignment given by (14) is the same as that given by policy  $(\Phi 1)$ . By the induction assumption, the remaining  $T - 1$  candidates can be assigned under policy  $(\Phi 1)$  to maximize the objective function  $R_w(\Phi)$  (6). Therefore, policy  $(\Phi 1)$  is optimal for  $T$  candidates.

Next, we compute the expected combined attribute values for the  $T$  candidates to be assigned. By the monotonicity of the threshold values and the induction assumption,  $a_{i,1} = a'_{i,0}$ ,  $i = 1, 2, \dots, T - 1$  is the  $i^{th}$  smallest expected combined attribute value for the  $T - 1$  candidates to be assigned. Let  $\hat{\mathcal{G}}_T^{(i)}$



(random variable) denote the  $i^{th}$  smallest combined attribute value for  $T$  candidates,  $i = 1, 2, \dots, T$ .

Conditioning on the value of  $\mathcal{G}(1)$  leads to

$$\begin{aligned}
 \mathbb{E}[\hat{\mathcal{G}}_T^{(i)}] &= \mathbb{E}[\mathbb{E}[\hat{\mathcal{G}}_T^{(i)} | \mathcal{G}(1)]] \\
 &= \mathbb{E}[\mathcal{G}(1) | a_{i-1,1} < \mathcal{G}(1) \leq a_{i,1}] \mathbb{P}(a_{i-1,1} < \mathcal{G}(1) \leq a_{i,1}) + \mathbb{E}[\hat{\mathcal{G}}_{T-1}^{(i-1)} | \mathcal{G}(1) \leq a_{i-1,1}] \mathbb{P}(\mathcal{G}(1) \leq a_{i-1,1}) \\
 &\quad + \mathbb{E}[\hat{\mathcal{G}}_{T-1}^{(i)} | \mathcal{G}(1) > a_{i,1}] \mathbb{P}(\mathcal{G}(1) > a_{i,1}) \\
 &= \left( \sum_{\gamma' = g_{i-1,1}^u}^{g_{i,1}^l} \gamma' p_{\mathcal{G}}(\gamma') \right) + a_{i-1,1} F_{\mathcal{G}}(a_{i-1,1}) + a_{i,1} (1 - F_{\mathcal{G}}(a_{i,1})) \\
 &= a_{i,0},
 \end{aligned}$$

with  $g_{i,1}^l$  and  $g_{i-1,1}^u$  given by (21). Therefore, the threshold values in the initial stage  $\{a_{i,0}\}_{i=1}^T$  are the expected combined attribute values for the  $T$  candidates to be assigned. This completes the proof.  $\square$

## 5. Proof of Proposition 3

The proof is based on induction on  $T$ . When  $T = 1$ , there is only one candidate to be assigned, and hence,  $i = 1$ ,  $t = 0$ . The expected value of  $\hat{\mathcal{A}}_1^{(1)}$  is just the expectation of  $\mathcal{A}(t)$ . From Proposition 3, only  $b_{1,0}$  is defined by (24) when  $T = 1$ , which is given by

$$b_{1,0} = \sum_{\gamma' = G_1}^{G_L} \mathbb{E}[\mathcal{A}(t) | \mathcal{G}(t) = \gamma'] p_{\mathcal{G}}(\gamma') = \mathbb{E}[\mathcal{A}(t)]. \quad (15)$$

Therefore, Proposition 3 holds for  $T = 1$ .

Suppose Proposition 3 holds for  $T' \leq T - 1$  and  $\{b'_{i,t}\}$  are defined by (24) for  $T - 1$ , for  $i = 1, 2, \dots, T - 1 - t$  and  $t = 0, 1, \dots, T - 2$ . Then we show that (24) holds for  $T$  with  $\{b_{i,t}\}$ , for  $i = 1, 2, \dots, T - t$  and  $t = 0, 1, \dots, T - 1$ . From the recursive definitions of  $\{a_{i,t}\}$  and (24),  $\{b_{i,t}\}$  are the same as  $\{b'_{i,t-1}\}$  for  $t = 1, 2, \dots, T - 1$ . We are left with  $\{b_{i,0}\}$ ,  $i = 1, 2, \dots, T$ , which need to be verified as the expected value of  $\hat{\mathcal{A}}_T^{(i)}$  for  $T$  candidates. Since the threshold values  $\{a_{i,t}\}$  are monotonically increasing with respect to  $i$ , then conditioning on the combined attribute value of the first candidate  $\mathcal{G}(1)$  leads to

$$\mathbb{E}[\hat{\mathcal{A}}_T^{(i)}] = \mathbb{E}_{\mathcal{G}}[\mathbb{E}_{\mathcal{A}}[\hat{\mathcal{A}}_T^{(i)} | \mathcal{G}(1)]]$$

$$\begin{aligned}
&= \mathbb{E}_{\mathcal{A}}[\hat{\mathcal{A}}_T^{(i)} | a_{i-1,1} < \mathcal{G}(1) \leq a_{i,1}] \mathbb{P}(a_{i-1,1} < \mathcal{G}(1) \leq a_{i,1}) + \mathbb{E}_{\mathcal{A}}[\hat{\mathcal{A}}_T^{(i)} | \mathcal{G}(1) \leq a_{i-1,1}] \mathbb{P}(\mathcal{G}(1) \leq a_{i-1,1}) \\
&\quad + \mathbb{E}_{\mathcal{A}}[\hat{\mathcal{A}}_T^{(i)} | \mathcal{G}(1) > a_{i,1}] \mathbb{P}(\mathcal{G}(1) > a_{i,1}) \\
&\stackrel{(a)}{=} \mathbb{E}_{\mathcal{G}} [\mathbb{E}_{\mathcal{A}}[\mathcal{A}(1) | \mathcal{G}(1)] | a_{i-1,1} < \mathcal{G}(1) \leq a_{i,1}] \mathbb{P}(a_{i-1,1} < \mathcal{G}(1) \leq a_{i,1}) + b_{i-1,1} \mathbb{P}(\mathcal{G}(1) \leq a_{i-1,1}) + b_{i,1} \mathbb{P}(\mathcal{G}(1) > a_{i,1}) \\
&\stackrel{(b)}{=} \left( \sum_{\gamma' = g_{i-1,1}^u}^{g_{i,1}^l} \mathbb{E}[\mathcal{A}(t) | \mathcal{G}(t) = \gamma'] \right) + b_{i-1,1} F_{\mathcal{G}}(a_{i-1,1}) + b_{i,1} (1 - F_{\mathcal{G}}(a_{i,1})) \\
&= b_{i,0},
\end{aligned}$$

where: equality (a) follows from the induction assumption; and equality (b) follows from that  $\mathcal{A}(t)$  and  $\mathcal{G}(t)$  are both IID. Therefore,  $b_{i,0}$  defined by (24) is the expected value of  $\hat{\mathcal{A}}_T^{(i)}$  for  $i = 1, 2, \dots, T$ , which completes the proof.  $\square$

## 6. A Short Proof of the Relationship between the Weight Vectors and the Achievement Ratios

We want to prove that if  $w_1 = 1$  is fixed, then  $\delta_A^\eta(\mathbf{w})$  decreases with  $w_2$  while  $\delta_B^\eta(\mathbf{w})$  increases with  $w_2$ . It is sufficient to prove that if  $w_1 = 1$  is fixed, then  $R_A(\Phi_1)$  decreases with  $w_2$  while  $R_B(\Phi_1)$  increases with  $w_2$ . Let  $\mathbf{w}^1 = (1, w_2^1)$  and  $\mathbf{w}^2 = (1, w_2^2)$  be two non-negative weight vectors, with  $w_2^1 > w_2^2$ . Let  $\Phi_1$  and  $\Phi_2$  denote the optimal SSAP optimal policy for WOSA indexed by  $\mathbf{w}_1$  and  $\mathbf{w}_2$ , respectively. Therefore,

$$R_A(\Phi_1) + w_2^1 R_B(\Phi_1) \geq R_A(\Phi_2) + w_2^1 R_B(\Phi_2),$$

$$R_A(\Phi_2) + w_2^2 R_B(\Phi_2) \geq R_A(\Phi_1) + w_2^2 R_B(\Phi_1).$$

Rearranging the terms leads to

$$w_2^1 (R_B(\Phi_1) - R_B(\Phi_2)) \geq R_A(\Phi_2) - R_A(\Phi_1) \geq w_2^2 (R_B(\Phi_1) - R_B(\Phi_2)).$$

Since  $w_2^1 > w_2^2$ , then  $R_B(\Phi_1) - R_B(\Phi_2) \geq 0$ , which completes the proof.

Following similar arguments, it can be proved that if  $w_2 = 1$  is fixed, then  $\delta_A^\eta(\mathbf{w})$  increases with  $w_1$  while  $\delta_B^\eta(\mathbf{w})$  decreases with  $w_1$ .

## References

- Derman, C., G. J. Lieberman, S. M. Ross. 1972. A sequential stochastic assignment problem. *Management Science* **18**(7) 349–355.
- Miettinen, K. 1999. *Nonlinear multiobjective optimization*, vol. 12. Springer Science & Business Media, New York, the United States.
